1 **Metabolic Modeling of Cystic Fibrosis Airway Communities Predicts**

2 **Mechanisms of Pathogen Dominance**

3

4 Michael A. Henson<sup>1</sup>, Giulia Orazi<sup>2</sup>, Poonam Phalak<sup>1</sup> and George A. O'Toole<sup>2</sup>

5

6 <sup>1</sup>Department of Chemical Engineering and Institute for Applied Life Sciences

7 University of Massachusetts, Amherst, MA 01003 USA

8

9 <sup>2</sup>Department of Microbiology and Immunology

10 Geisel School of Medicine at Dartmouth, Hanover, NH USA

11

12 #Address correspondence to Michael A. Henson, mhenson@umass.edu.

13

14

## 15 **Abstract**

16 Cystic fibrosis (CF) is a fatal genetic disease characterized by chronic lung infections due to aberrant  
17 mucus production and the inability to clear invading pathogens. The traditional view that CF infections  
18 are caused by a single pathogen has been replaced by the realization that the CF lung usually is colonized  
19 by a complex community of bacteria, fungi and viruses. To help unravel the complex interplay between  
20 the CF lung environment and the infecting microbial community, we developed a community metabolic  
21 model comprised of the 17 most abundant bacterial taxa, which account for >95% of reads across  
22 samples, from three published studies in which 75 sputum samples from 46 adult CF patients were  
23 analyzed by 16S rRNA gene sequencing. The community model was able to correctly predict high  
24 abundances of the “rare” pathogens *Enterobacteriaceae*, *Burkholderia* and *Achromobacter* in three  
25 patients whose polymicrobial infections were dominated by these pathogens. With these three pathogens  
26 removed, the model correctly predicted that the remaining 43 patients would be dominated by  
27 *Pseudomonas* and/or *Streptococcus*. This dominance was predicted to be driven by relatively high  
28 monoculture growth rates of *Pseudomonas* and *Streptococcus* as well as their ability to efficiently  
29 consume amino acids, organic acids and alcohols secreted by other community members. Sample-by-  
30 sample heterogeneity of community composition could be qualitatively captured through random  
31 variation of the simulated metabolic environment, suggesting that experimental studies directly linking  
32 CF lung metabolomics and 16S sequencing could provide important insights into disease progression and  
33 treatment efficacy.

## 34 **Importance**

35 Cystic fibrosis (CF) is a genetic disease in which chronic airway infections and lung inflammation result  
36 in respiratory failure. CF airway infections are usually caused by bacterial communities that are difficult  
37 to eradicate with available antibiotics. Using species abundance data for clinically stable adult CF patients  
38 assimilated from three published studies, we developed a metabolic model of CF airway communities to  
39 better understand the interactions between bacterial species and between the bacterial community and the

40 lung environment. Our model predicted that clinically-observed CF pathogens could establish dominance  
41 over other community members across a range of lung nutrient conditions. Heterogeneity of species  
42 abundances across 75 patient samples could be predicted by assuming that sample-to-sample  
43 heterogeneity was attributable to random variations in the CF nutrient environment. Our model  
44 predictions provide new insights into the metabolic determinants of pathogen dominance in the CF lung  
45 and could facilitate the development of improved treatment strategies.

46

## 47 **Introduction**

48 Cystic fibrosis is a genetic disease which results in excessive mucus production that reduces lung function  
49 and impedes the release of pancreatic enzymes (1, 2). While digestive problems are highly prevalent  
50 among CF patients (3), approximately 80-95% of CF deaths are attributable to respiratory failure due to  
51 chronic airway infections and associated inflammation (1). The Cystic Fibrosis Foundation (CFF)  
52 estimates that approximately 70,000 CF patients are living worldwide and about 1,000 new CF cases are  
53 diagnosed in the United States each year ([www.cff.org](http://www.cff.org)). Following Koch's postulate (4), the traditional  
54 view of CF lung infections has been that specific airway pathogens are responsible for monomicrobial  
55 infections (5). CF bacterial pathogens that have been identified from patient sputum samples and  
56 commonly studied *in vitro* using pure culture include *Pseudomonas aeruginosa*, *Haemophilus influenzae*,  
57 *Staphylococcus aureus* and *Burkholderia cepacia* complex, including antibiotic-resistant strains such as  
58 methicillin-resistant *S. aureus* (MRSA) and multidrug-resistant *P. aeruginosa* (MDRPA) (1), as well as  
59 less common species such as *Achromobacter xylosoxidans*, *Stenotrophomonas maltophilia* and  
60 pathogenic *Escherichia coli* strains (6).

61 With advent of culture-independent techniques such as 16S rRNA gene amplicon library sequencing,  
62 sputum and bronchoscopy samples from CF patients can be analyzed systematically with respect to the  
63 diversity and abundance of bacterial taxa present (7, 8). Numerous studies have shown that CF airway  
64 infections are rarely monomicrobial, but rather the CF lung harbors a complex community of bacteria that  
65 originate from the mouth, skin, intestine and the environment (7-10). 16S sequencing can reliably  
66 delineate community members down to the genus level, showing that the most common genera in adult  
67 CF patient samples are *Streptococcus*, *Pseudomonas*, *Prevotella*, *Veillonella*, *Neisseria*, *Porphorymonas*  
68 and *Catonella* (7). While the identities and relative abundances of the genera present can be determined  
69 by 16S rRNA gene sequencing, different analysis techniques are required to understand the interactions  
70 between the multiple bacterial taxa and the CF lung environment, the role of the individual microbes in

71 shaping community composition and behavior, and the impact of community composition on the efficacy  
72 of antibiotic treatment regimens.

73 *In silico* metabolic modeling has emerged as a powerful approach for analyzing complex microbial  
74 communities by integrating genome-scale reconstructions of single-species metabolism within  
75 mathematical descriptions of metabolically interacting communities (11, 12). Modeled species  
76 interactions typically include competition for host-derived nutrients and cross-feeding of secreted  
77 byproducts such as organic acids, alcohols and amino acids between species (13, 14). Due to challenges  
78 in developing manually curated reconstructions of poorly studied species, including those present in the  
79 CF lung, most *in silico* community models have been restricted to ~5 microbial species (15-17) and fail to  
80 adequately cover the diversity of *in vivo* communities. This limitation can be overcome in bacterial  
81 communities by using semi-curated reconstructions developed through computational pipelines such as  
82 the ModelSeed (18), AGORA (19) and other methods (20). Given the availability of suitable single-strain  
83 metabolic reconstructions, a number of alternative methods have been developed for mathematical  
84 formulation and numerical solution of microbial community models (21-24). The recently developed  
85 SteadyCom method is particularly notable due to its formulation that ensures proper balancing of  
86 metabolites across the species and scalability to large communities (25). A properly formulated  
87 community model can yield information that is difficult to ascertain experimentally, including the effects  
88 of the host environment on community growth, species abundances, and cross-fed metabolite secretion  
89 and uptake rates.

90 In this paper, we utilized 16S rRNA gene amplicon library sequencing data from three published studies  
91 (26-28) to develop a 17-species bacterial community model for predicting species abundances in CF  
92 airway communities. The 16S rRNA gene sequence data covers 75 distinct sputum samples from 46 adult  
93 CF patients, and captures the heterogeneity of CF polymicrobial infections with respect to taxonomic  
94 diversity and the prevalence of pathogens including *Pseudomonas*, *Streptococcus*, *Burkholderia*,  
95 *Achromobacter* and *Enterobacteriaceae*. The *in silico* community model was used to predict when each

96 pathogen may dominate the polymicrobial infection by using the 16S rRNA gene sequence data to restrict  
97 which pathogens were present in the simulated community. By randomly varying the availability of host-  
98 derived nutrients, the model was used to simulate sample-by-sample heterogeneity of community  
99 compositions across patients and to understand how metabolite cross-feeding enhanced pathogen  
100 abundances. To our knowledge, this study represents the first attempt to metabolically model the CF  
101 airway bacterial community rather than model the individual metabolism of common CF pathogens (29-  
102 34). Furthermore, our approach of directly predicting species abundances rather than using measured  
103 abundances as model input data to constrain predictions distinguished our study from other community  
104 modeling efforts driven by 16S rRNA gene sequence data (14, 35-37).

## 105 **Results**

### 106 Few Taxonomic Groups Dominate the CF Airway Community Samples

107 Principal component analysis (PCA) was performed on the normalized read data of the 75 samples to  
108 evaluate sample heterogeneity. The first three principal components (PCs) captured 77.8% of the data  
109 variance, with the first PC capturing 57.3% of variance and most heavily weighting the most abundant  
110 genera *Pseudomonas*, *Streptococcus* and *Prevotella* as expected (Table S5). A considerable degree of  
111 heterogeneity was evident from a plot of the 75 samples in the coordinates defined by the first three PCs  
112 (Figure 2A). Most striking were the outlier samples from three patients infected with *Enterobacteriaceae*  
113 (samples 25-27), *Burkholderia* (samples 19-21) or *Achromobacter* (samples 31, 32) compared to the  
114 patients lacking these three organisms (*i.e.*, the remaining 67 samples).

115 Because each pathogen infected only a single patient among the 46 included patients, we generated a  
116 smaller dataset of 67 samples by removing these 8 samples. When PCA was performed on this reduced  
117 dataset, the first three PCs explained 92.6% of the data variance (Table S6), suggesting substantially  
118 reduced heterogeneity compared to the full dataset. These three PCs heavily weighted only the four  
119 taxonomic groups *Pseudomonas*, *Streptococcus*, *Prevotella* and *Haemophilus*, with the first PC  
120 representing high *Pseudomonas* and low *Streptococcus*, the second PC component representing high

121 *Streptococcus* and moderate *Pseudomonas*, and the third PC representing high *Haemophilus*, low  
122 *Pseudomonas* and low *Streptococcus*. Considerable heterogeneity was evident when the 67 samples were  
123 plotted using the first two PCs accounting for 84.2% of the variance (Figure 2B). Here the first PC  
124 represented high *Pseudomonas*, low *Streptococcus*, moderate *Prevotella* and moderate *Haemophilus*, and  
125 the second PC represented low *Pseudomonas*, high *Streptococcus*, low *Prevotella* and low *Haemophilus*.  
126 Based on these results, we focused our community modeling efforts on predicting the infrequent  
127 dominance of the pathogens *Enterobacteriaceae*, *Burkholderia* and *Achromobacter*, and the heterogeneity  
128 in the abundances of *Pseudomonas*, *Streptococcus*, *Prevotella* and *Haemophilus* across the remaining  
129 samples. *Pseudomonas*, *Streptococcus* and *Prevotella* have been found by directly sampling the lung of  
130 CF patients via bronchoalveolar lavage (38), while *Haemophilus* is a widely-accepted CF pathogen (7).  
131 The other 10 genera (Table 1) were maintained in the model to simulate competition/cooperation with the  
132 more dominant species and to determine if the relatively low abundances of these genera could be  
133 predicted.

#### 134 The Community Model Can Reproduce Dominance of CF Pathogens

135 We simulated the growth of each species individually to compare their monoculture growth rates with the  
136 nominal community nutrient uptake rates (Table S4). Interestingly, the three highest growth rates  
137 belonged to the rare pathogens *Escherichia*, *Burkholderia* and *Achromobacter*, while the next three  
138 highest growth rates belonged to the common pathogens *Pseudomonas*, *Streptococcus* and  
139 *Staphylococcus* (Figure 3A; species numbered as in Table 1). These predictions were consistent with our  
140 modeling results for the gut microbiome (39) where opportunistic pathogens consistently had higher  
141 growth rates than commensal species. The other two species *Prevotella* and *Haemophilus* commonly  
142 observed in the 75 patient samples were predicted to have much lower *in silico* growth rates. The three  
143 species representing *Fusobacterium*, *Granulicatella* and *Porphyromonas* did not grow individually due to  
144 their inability to meet the defined ATP maintenance demand, although they could grow when strategically  
145 combined with other modeled species. For example, *Fusobacterium*, *Granulicatella* and *Porphyromonas*

146 were predicted to grow in coculture with *Ralstonia*, *Prevotella* and *Actinomyces*, respectively. The species  
147 abundances predicted for a specified nutrient condition depended both on the monoculture growth rates  
148 and the ability of each species to efficiently utilize secreted metabolites to enhance its growth rate. These  
149 emergent cross-feeding relationships allowed otherwise slower growing species to coexist with species  
150 that exhibited high monoculture growth rates.

151 We conducted simulations using the nominal nutrient uptake rates (Table S4) to determine if the  
152 community model could capture dominance of each rare pathogen in the absence of the other two rare  
153 pathogens. Each simulation was performed by constraining the abundances of the other two pathogens to  
154 zero, effectively producing reduced communities of 15 species. The predicted abundances from each  
155 simulation were compared to the normalized reads averaged over the patient samples which contained the  
156 associated pathogen: *Enterobacteriaceae/Escherichia* (samples 25-27; Figure 3B), *Burkholderia* (samples  
157 19-21; Figure 3C) or *Achromobacter* (samples 31 and 32; Figure 3D). For each simulated case, the model  
158 correctly predicted dominance of the associated pathogen. For the *Burkholderia*- and *Achromobacter*-  
159 infected patients, the abundances of the dominant pathogen as well as less prevalent species were well  
160 predicted.

161 We performed simulations for the remaining 43 patients by reducing the community to 14 species by  
162 constraining the abundances of all three rare pathogens to zero. The model predicted abundances were  
163 compared to the normalized reads averaged over the 67 samples remaining when the 8 rare pathogen-  
164 containing samples were removed (Figure 3E). The model correctly predicted that *Pseudomonas*,  
165 *Streptococcus* and *Prevotella* would dominate the community, although the *Prevotella* abundance was  
166 overpredicted at the expense of *Streptococcus* as well as several less abundant genera. The only other  
167 genus present in the simulated community was *Staphylococcus*, while the averaged reads showed a  
168 greater amount of diversity. Compared to the averaged data, individual samples showed less diversity,  
169 which is more consistent with model predictions as discussed below.

170 The Community Model Can Reproduce Pathogen Heterogeneity Across Airway Samples



171 The CF airway communities exhibited a substantial degree of sample-to-sample heterogeneity when rare  
172 pathogens were present (Figure 2A) or absent (Figure 2B). We performed simulations to assess the extent  
173 to which sample-to-sample differences in taxonomic group reads could be explained by heterogeneity in  
174 the metabolic environment of the CF lung. More specifically, we randomized the community nutrient  
175 uptake rates around their nominal values (Materials and Methods; Table S4) to mimic heterogeneous lung  
176 environments shown to occur across CF patients (40, 41) and in longitudinal samples from a single  
177 patient (42). Each simulation with a set of randomized uptake rates was termed a “simulated sample,” and  
178 we tested the hypothesis that the experimental samples could be interpreted as having been drawn from  
179 the much larger set of simulated samples we generated. Due to the relatively small number of  
180 *Enterobacteriaceae/Escherichia*-, *Burkholderia*- and *Achromobacter*-containing samples, we only  
181 performed 100 randomized community simulations for each of these pathogens. By contrast, 1000  
182 randomized simulations were performed for communities without these three rare pathogens since the  
183 associated patient sample size was comparatively large. The single model simulation that best represented  
184 a particular patient sample was determined by the minimum least-squares error between the normalized  
185 measured reads and the predicted abundances across all simulations. For the 8 rare pathogen-containing  
186 samples, we plotted the measured reads and predicted abundances of the five most common genera  
187 (*Pseudomonas*, *Streptococcus*, *Prevotella*, *Haemophilus*, *Staphylococcus*) and the pathogen of interest.  
188 For the remaining 67 samples, we plotted the five most common genera plus the next most abundant  
189 genus according to measured reads.

190 Randomized nutrient simulations were able to generate model predictions that reproduced the major  
191 features of the 3 *Enterobacteriaceae/Escherichia*-containing samples (Figure 4A), including the high  
192 *Enterobacteriaceae/Escherichia* reads and presence of the other main community members  
193 (*Pseudomonas*, *Streptococcus* and *Prevotella*). The *Streptococcus* reads were predicted relatively  
194 accurately, while *Pseudomonas* reads were underpredicted and *Prevotella* reads were overpredicted. As  
195 measured by the least-squares error, improved predictions were obtained for the 3 *Burkholderia*-

196 containing samples (Figure 4B). The *Burkholderia* reads were accurately reproduced and *Streptococcus*  
197 was correctly predicted to be the second-most abundant genus, suggesting a synergism between these two  
198 genera. This prediction has experimental support from *in vitro* experiments showing that mucin-degrading  
199 anaerobes such as *Streptococci* promote the growth of CF pathogens such as *B. cenocepacia* when mucins  
200 are provided as the sole carbon source (43). The two *Achromobacter*-containing samples were well  
201 predicted in terms of *Achromobacter* reads and *Pseudomonas* being the other dominant genus (Figure  
202 4C). These predictions are consistent with an *in vitro* study showing that *Achromobacter* sp. enhanced the  
203 ability of multiple *P. aeruginosa* strains to form biofilms (44). Furthermore, a clinical study with 53  
204 patients having positive cultures for *A. xylosoxidans* showed that all 6 patients that were chronically  
205 infected by *A. xylosoxidans* were co-infected with *P. aeruginosa* (45). Complete comparisons of the  
206 normalized measured reads and model predicted abundances for the 8 samples with the rare pathogens are  
207 presented in Table S7, which shows that the model generally produced less diverse communities as  
208 measured by the richness (number of species with abundances exceeding 1%) and the equitability (the  
209 inverse Simpson metric; (46)).

210 The lack of patient samples containing *Enterobacteriaceae/Escherichia*, *Burkholderia* and  
211 *Achromobacter* limited our ability to analyze heterogeneity of communities with these pathogens. By  
212 contrast, the 67 samples remaining when the 8 samples containing these three pathogens were removed  
213 offered a much larger dataset for heterogeneity analysis. Each of these 67 samples was matched to one of  
214 the 1000 randomized model simulations according to the smallest least-squares error between the  
215 normalized reads of the sample and the predicted abundances of the model (Table S8). Representative  
216 results are shown for patient samples with relatively small (Figure 5A), moderate (Figure 5B) and large  
217 (Figure 5C) error values. Samples which were most accurately reproduced generally contained high  
218 *Pseudomonas* reads (84%+/-15%) with the remainder of the community consisting of *Streptococcus* and  
219 *Prevotella* (Figure 5A). These 22 samples were best matched by 11 distinct models, suggesting that

220 patient samples dominated by *Pseudomonas* contained a higher degree of heterogeneity than the  
221 simulated samples.

222 The 22 samples which produced moderate prediction errors were characterized by lower and more  
223 variable *Pseudomonas* reads (48% $\pm$ 28%) as well as more variable distributions of *Streptococcus* and  
224 *Prevotella* reads (Figure 5B). The ensemble of randomized models could capture the relative amounts of  
225 these three genera, but often predicted the presence of *Staphylococcus* not observed in the patient  
226 samples. This discrepancy could be attributable to the unmodeled ability of *Pseudomonas* to secrete  
227 diffusible toxins which inhibit *Staphylococcus* respiration and render *Staphylococcus* less metabolically  
228 competitive in partially aerobic environments (47) such as the CF lung. Interestingly, the model ensemble  
229 could reproduce the relatively high *Ralstonia* reads in sample 1 while also predicting no *Ralstonia* in  
230 samples 15 and 69. The 23 samples which produced the largest prediction errors were characterized by  
231 much lower *Pseudomonas* reads (13%), higher reads of *Streptococcus* and *Prevotella* (34% and 19%,  
232 respectively; e.g. samples 26 and 74 in Figure 5C) and higher representation of less common genera.  
233 These samples also produced higher *Haemophilus* reads, primarily due to two *Haemophilus*-dominated  
234 samples (e.g. sample 39 in Figure 5C). While the model ensemble generally was able to reproduce the  
235 observed *Streptococcus* and *Prevotella* reads in these samples, the models tended to overpredict  
236 *Pseudomonas* and *Staphylococcus* at the expense of the less common genera. In particular, the ensemble  
237 underpredicted the abundances of *Rothia*, *Fusobacterium* and *Gemella* while the average reads of these  
238 three genera across the 23 samples summed to 16%. This discrepancy could suggest that these 23 samples  
239 were obtained from patients with less advanced CF lung disease, which correlates to higher diversity  
240 communities *in vivo* (28, 48).

241 To gain further insights into the ability of the community model to mimic sample-to-sample heterogeneity  
242 in the absence of rare pathogens, we compared read data and abundance predictions in the PC space  
243 calculated from the 67 patient samples. Each of the 1000 model simulations was mapped into the two-  
244 dimensional space defined by the first two PCs (Figure 2B), which explained 84.2% of normalized read

245 data variance (Table S6). The model ensemble was able to reproduce most of the observed variability as  
246 reflected by the cloud of model simulations overlapping most of the patient samples (Figure 6A). The  
247 patient and simulated samples covered the same range of the first PC, which was heavily weighted by  
248 *Pseudomonas*, *Streptococcus* and *Prevotella* (Table S6). Importantly, this consistency shows that  
249 heterogeneity across these three dominant genera could be predicted from variations in the CF lung  
250 metabolic environment, as we hypothesized.

251 The model ensemble also could reproduce variations in the second PC, which was heavily weighted by  
252 the three dominant genera and *Haemophilus*, for sufficiently large values of the first PC, which  
253 corresponded to relatively high *Pseudomonas* and low *Streptococcus* and *Prevotella*. By contrast, the  
254 model ensemble did not cover the patient samples in the lower left quadrant of the PC plot (Figure 6B).  
255 These samples were characterized by unusual combinations of relatively high *Prevotella*, *Haemophilus*,  
256 *Rothia* and/or *Fusobacterium* that the model could not reproduce in its present form. Of these 12 poorly  
257 modeled samples, *Prevotella* was highly represented in 8 samples. When the normalized reads of these 8  
258 samples and their associated best-fit abundances were averaged, the models overpredicted *Pseudomonas*,  
259 *Streptococcus* and *Staphylococcus* at the expense of the less common genera (Figure 6C).

#### 260 The Community Model Predicts that Pathogen Dominance is Driven by Metabolite Cross-feeding

261 To investigate putative metabolic mechanisms by which pathogens may establish dominance in the CF  
262 lung, we used model predictions to quantify rates of metabolite cross-feeding between species. For each  
263 rare pathogen (*Escherichia*, *Burkholderia* and *Achromobacter*), 100 simulations performed with  
264 randomized community uptake rates were used to calculate average exchange rates of the five most  
265 significantly cross-fed metabolites between *Pseudomonas*, *Streptococcus* and the pathogen of interest.  
266 The overall metabolite exchange rate from one species to another species was calculated by determining  
267 the minimum uptake or secretion rate for each exchanged metabolite and then summing these minimum  
268 rates over all exchanged metabolites.

269 *Escherichia* was predicted to consume the organic acids acetate, formate and L-lactate produced by  
270 *Streptococcus*, while *Streptococcus* benefitted from the amino acids serine and threonine secreted by  
271 *Escherichia* (Figures 7A and 7D). Due to the existence of alternative optima with respect to the secretion  
272 products (49), L-lactate secretion was not predicted in *Streptococcus* monoculture even through the  
273 metabolic reconstruction supported L-lactate production (19) [[www.vmh.life](http://www.vmh.life)]. While *Streptococcus*  
274 strains are well known to product L-lactate as the primary product via homolactic fermentation (50, 51),  
275 we chose not to manually curate the metabolic reconstruction since *in silico* L-lactate synthesis was  
276 induced by the presence of other community members such as *Escherichia*. *Pseudomonas* was minimally  
277 involved in metabolite exchange due to its low average abundance (~1%) across the 100 simulations.  
278 Hence, our model suggested that organic acid cross-feeding could play a role in *Enterobacteriaceae*  
279 propagation in the CF lung.

280 More complex cross-feeding relationships were predicted for *Burkholderia*-containing communities that  
281 supported average *Pseudomonas* and *Streptococcus* abundances both exceeding 10%. The largest  
282 exchange rates were predicted for formate and acetate produced by *Streptococcus* and consumed by  
283 *Burkholderia* (Figures 7B and 7E). The two species also exchanged amino acids, with *Streptococcus*  
284 providing alanine to *Burkholderia*, and *Burkholderia* producing aspartate and serine for *Streptococcus*.  
285 *Burkholderia* provided the same two amino acids to *Pseudomonas* while receiving a small exchange of  
286 acetate in return. *Pseudomonas* also consumed formate secreted by *Streptococcus*. These model  
287 predictions suggested that acetate, formate and alanine produced by *Streptococcus* via heterolactic  
288 fermentation (50) could promote *Burkholderia* growth *in vivo*. Indeed, *in vitro* experiments have shown  
289 that mucin-degrading anaerobes such as *Streptococci* may promote the growth of CF pathogens such as *B.*  
290 *cenocepacia* by secreting acetate (43).

291 Compared to the other two pathogens, *Achromobacter* was predicted to be less efficient at cross-feeding  
292 having only small uptake rates of alanine, L-lactate and threonine secreted by the other two species. By  
293 contrast, *Pseudomonas* was predicted to benefit from relatively large uptake rates of formate produced by

294 *Streptococcus* and succinate produced by *Achromobacter*. Collectively, these model predictions could  
295 help explain the enhanced ability of *Burkholderia* to dominate the simulated CF airway communities  
296 compared to *Achromobacter* (Figure 4) despite the single-species growth rates of the two species being  
297 similar (Figure 3).

298 Similar cross-feeding analyses were performed for 1000 simulations with randomized nutrient uptake  
299 rates in 14-species communities lacking *Escherichia*, *Burkholderia* and *Achromobacter*. To investigate  
300 the possibility of differential cross-feeding patterns, the simulations were split into 500 cases with the  
301 highest *Pseudomonas* abundances and 500 cases with the lowest *Pseudomonas* abundances (Figure 8A).  
302 For each set of 500 simulations, the average exchange rates of the five most significantly cross-fed  
303 metabolites between the four most abundant species (*Pseudomonas*, *Streptococcus*, *Prevotella* and  
304 *Staphylococcus*) were calculated. The overall metabolite exchange rate between any two species were  
305 calculated from the individual metabolite uptake and secretion rates as before.

306 When *Pseudomonas* abundances were predicted to be relatively high (average 61%), community  
307 interactions were dominated by *Pseudomonas* consumption of formate, ethanol, acetate and aspartate  
308 secreted by the other three species (Figure 8B). Formate cross-feeding was predicted to be particularly  
309 important, which was consistent with an *in vitro* study showing that expression of the *P. aeruginosa* *fdnH*  
310 gene (encoding a formate dehydrogenase) was elevated in synthetic sputum medium compared to glucose  
311 minimal media (52). Similarly, the expression of the *P. aeruginosa* *adhA* (encoding an alcohol  
312 dehydrogenase) was elevated in patient-derived CF sputum compared to *in vitro* rich medium (53). Since  
313 *P. aeruginosa* strains have the capability to uptake both formate and ethanol (54, 55), these *in vitro*  
314 studies suggest that this cross-feeding mechanism could occur in CF airway communities. *Staphylococcus*  
315 was the major source of exchanged formate and ethanol (Figure 8D), a prediction consistent with studies  
316 showing that *P. aeruginosa* benefits from the presence of *S. aureus* (47, 56). Both alanine and aspartate  
317 have been shown to serve as preferred carbon sources for *P. aeruginosa* in a minimal medium  
318 supplemented with lyophilized CF sputum (52). However, the ensemble model did not predict exchange

319 of L-lactate between *P. aeruginosa* and *S. aureus*, which differs from coculture experiments that mimic  
320 the CF lung environment (47). Strong interactions between *P. aeruginosa* and various *Streptococci* also  
321 have been reported (28), although the importance of metabolite cross-feeding in mediating these  
322 interactions remains incompletely understood (57). Finally, in the model *Pseudomonas* supplied small  
323 amounts of D-lactate for *Prevotella* and *Staphylococcus* consumption, a prediction consistent with an *in*  
324 *vitro* study showing *P. aeruginosa* anaerobic production of the LldA enzyme catalyzing D-lactate  
325 synthesis (58).

326 When *Pseudomonas* abundances were predicted to be relatively low (average 32%), metabolite cross-  
327 feeding remained dominated by *Pseudomonas* consumption of secreted byproducts and amino acids  
328 (Figure 8C). *Pseudomonas* was predicted to have high consumption rates of formate produced by all three  
329 other species and L-lactate synthesized only by *Streptococcus*, consistent with the ability of *S. salivarius*  
330 (59) and *P. aeruginosa* (47) to synthesize and consume L-lactate, respectively. Higher exchange rates  
331 between *Streptococcus* and *Staphylococcus* were predicted when *Pseudomonas* abundances were  
332 relatively low (Figure 8E). The two species cross-fed alanine and L-lactate produced by *Streptococcus*,  
333 and aspartate and ethanol secreted by *Staphylococcus*. Our predicted cross-feeding relationships in  
334 *Pseudomonas*- and *Streptococcus*-dominated communities could provide insights into CF disease  
335 progression, as high abundances of *Streptococcus* relative to *Pseudomonas* has been shown to correlate to  
336 higher diversity airway communities and improved CF clinical stability (28).

## 337 **Discussion**

338 The airways of cystic fibrosis (CF) patients are commonly infected by complex communities of  
339 interacting bacteria, fungi and viruses which complicate disease assessment and treatment. The unique  
340 bacterial communities resident in individual patients can be longitudinally resolved to the genus level by  
341 applying 16S rRNA gene amplicon library sequencing to sputum and bronchoscopy samples (8). While  
342 16S rRNA gene sequencing technology provides an unprecedented capability to identify bacterial  
343 pathogens in the CF lung, other analyses are required to understand how community members interact

344 and how these interactions impede or promote disease progression. Metabolomics represents a powerful  
345 tool to interrogate the complex metabolic environment of the CF lung (60), but the number and depth of  
346 studies published to date has been limited. Metabolic modeling is a complementary tool for probing  
347 complex microbial communities and their interactions mediated through competition for host-derived  
348 nutrients and cross-feeding of secreted metabolites (11). Community metabolic models can provide  
349 information difficult to obtain by purely experimental means, such as the combined impact of nutrient  
350 environment and metabolic interactions on community composition. Metabolic models also can predict  
351 the rates of metabolite exchange between species and identify cross-feeding relationships difficult to  
352 delineate through metabolomic analyses.

353 We used 16S rRNA gene sequence data from three published studies (26-28) to construct and test a  
354 metabolic model for prediction of airway community compositions in adult CF patients. The assembled  
355 dataset consisted of 75 distinct samples from 46 patients who were judged to be stable or recovered from  
356 treatment in the original studies. Principal component analysis performed on 16S read data showed  
357 considerable heterogeneity of community composition across the 75 samples, including three patients  
358 infected with *Enterobacteriaceae*, *Burkholderia* and *Achromobacter* pathogens. Interestingly, each of  
359 these three patients was infected by only one of these “rare” pathogens, a characteristic we used to  
360 simplify our metabolic model simulations. The remaining 67 samples from 43 patients were largely  
361 dominated by *Pseudomonas* and/or *Streptococcus* but still exhibited substantial composition  
362 heterogeneity which provided a sufficiently-rich dataset to explore sample-to-sample variability.

363 The community metabolic model was constructed by ranking the identified taxa according to their total  
364 reads across the 75 samples and representing each taxonomic group with a single genome-scale metabolic  
365 reconstruction obtained from the AGORA database ([www.vmh.life](http://www.vmh.life)) (19). To limit model complexity,  
366 only the 17 top-ranked taxa (16 genera and 1 combined family/genus) were included. The resulting *in*  
367 *silico* community contained the most common CF pathogens (*Pseudomonas aeruginosa*, *Haemophilus*  
368 *influenzae*, *Staphylococcus aureus*), “rare” pathogens (*Escherichia coli*, *Burkholderia cepacian*,



369 *Achromobacter xylosoxidans*), and 11 other species commonly observed in the CF sputum samples (e.g.  
370 *Prevotella melaninogenica*, *Rothia mucilaginosa*, *Fusobacterium nucleatum*). The 17 modeled taxa  
371 provided substantial coverage of the read data with an average coverage of 95.6+/-3.9% across the 75  
372 samples. Because our *in silico* objective of growth rate maximization tends to produce low diversity  
373 communities dominated by ~5 species (39), the relatively low diversity of these adult CF lung samples  
374 made them particularly well suited for analysis through metabolic modeling as compared to considerably  
375 more diverse bacterial communities found elsewhere in the human body (e.g. intestinal tract (39, 61);  
376 chronic wounds (62)).

377 The community metabolic model required specification of host-derived nutrients that mimicked the CF  
378 lung environment in terms of the nutrients available, their allowed uptake rates across the community, and  
379 their allowed uptake rates by individual species. Given that the 17-species model contained 271  
380 community uptake rates and a total of 2,378 species-specific uptake rates, a model tuning method was  
381 developed to manage the daunting complexity. A putative list of host-derived nutrients was compiled by  
382 starting with the synthetic sputum medium SCFM2 (63) and adding other nutrients either required for  
383 monoculture growth of at least one modeled species, measured in metabolomic analyses of CF sputum  
384 samples or identified through *in silico* analyses. The resulting 81 nutrients were separated into 14 distinct  
385 groups to facilitate tuning of nominal community uptake rates to qualitatively match average read data for  
386 the rare pathogen samples and the *Pseudomonas/Streptococcus*-dominated samples. This tuning process  
387 proved to be the bottleneck of model development even under the simplifying assumption that the species  
388 uptake rates were not limiting. A more streamlined and experimentally-driven tuning process would be  
389 facilitated by the availability of matched 16S and metabolomics data for large sets of CF sputum samples.  
390 Despite the challenges associated with defining physiologically-relevant nutrient uptake rates, the  
391 community model was able to predict species abundance in qualitative agreement with average read data  
392 for *Enterobacteriaceae*-, *Burkholderia*-, *Achromobacter*- and *Pseudomonas/Streptococcus*-dominated  
393 samples. The modeling effort was simplified by omitting the other two rare pathogens when simulating

394 the 3 *Enterobacteriaceae*-, 3 *Burkholderia*- and 2 *Achromobacter*-containing samples and omitting all  
395 three rare pathogens when simulating the other 67 samples, as justified through analysis of the 16S rRNA  
396 gene sequence data. The 15-species models used to simulate the rare pathogen-containing samples were  
397 able to reproduce dominance of the associated pathogen and, to a lesser extent, the abundances of less  
398 prevalent species. However, satisfactory prediction of the 2 *Achromobacter*-containing samples required  
399 the addition of four carbon sources (arabinose, fumarate, galactonate, xylose) which have not been  
400 measured in the CF lung to our knowledge. While there is some experimental evidence to support their  
401 inclusion, the need to add these four metabolites to elevate *in silico* *Achromobacter* growth could point to  
402 limitations of the modeled nutrients and their defined uptake rates.

403 The 14-species model used to simulate the rare pathogen-free samples predicted that *Pseudomonas* and  
404 *Streptococcus* would be the dominant genera, and that *Prevotella* and *Staphylococcus* also would be  
405 present in the community. These predictions provided qualitative agreement with the 16S rRNA gene  
406 sequence read data averaged across the 67 samples, although the predicted abundance of *Prevotella* was  
407 comparatively high and the predicted diversity was comparatively low. Given the uncertainty associated  
408 with identifying host-derived nutrients and translating these available nutrients into appropriate  
409 community uptake rates, we considered our predictions to provide satisfactory *in silico* recapitulation of  
410 measured community compositions across the set of four dominant CF pathogens.

411 A hallmark of CF lung infections is poorly understood differences in bacterial community compositions  
412 between patients and in longitudinal samples collected from a single patient (40). We performed  
413 simulations to test the hypothesis that these differences might be partially attributable to sample-to-  
414 sample variations in the nutrient environment in the CF lung. Nutrient variability was simulated by  
415 randomizing the community uptake rates around their nominal values found through manual model  
416 tuning. We performed 100 model ensemble simulations for each 15-species community containing a rare  
417 pathogen to determine if the associated patient samples could be well fit by a simulated sample. Using the  
418 least-squares difference between the measured reads and predicted abundances as the goodness-of-fit

419 measure, we found that the model ensembles could satisfactorily reproduce the community compositions  
420 of the 8 rare pathogen-containing samples. The best-fit models tended to provide good predictions of rare  
421 pathogen reads due their relatively large values (average 65% across the 8 samples), while the accuracy of  
422 read predictions for less prevalent species was more variable.

423 Due to the availability of a much larger dataset of 67 patient samples, the rare pathogen-free model  
424 consisting of 14 species afforded an opportunity to investigate sample-to-sample heterogeneity in more  
425 depth. We performed 1000 model ensemble simulations with randomized nutrient uptake rates to find  
426 best-fit models. Patient samples with relatively high *Pseudomonas* reads tended to be well fit because the  
427 model predicted *Pseudomonas* dominance over a wide range of nutrient conditions. Less accurate but still  
428 satisfactory fits were obtained for patient samples with moderate *Pseudomonas* and relatively high  
429 *Streptococcus* reads. The model ensemble proved somewhat deficient in fitting samples with high reads  
430 of *Prevotella* or of the less common genera *Haemophilus*, *Rothia* and *Fusobacterium*. This deficiency  
431 could be attributable to the *in silico* lung environment not containing key nutrients and/or not specifying  
432 sufficiently large uptake rates of supplied nutrients to support high abundances of these genera.

433 The quality of sample fits also was correlated to the sample diversity, with the best fits having the lowest  
434 average diversity (inverse Simpson index of 0.10), moderate fits having an intermediate average diversity  
435 (inverse Simpson index of 0.18), and poor fits having the highest average diversity (inverse Simpson  
436 index of 0.23). For these three sets of samples, the best-fit models had average diversities of 0.10, 0.16  
437 and 0.20, respectively. We believe that the lower predicted diversities were attributable to the modeling  
438 assumption that the CF lung community maximizes its collective growth rate. Using a community  
439 metabolic model of the human gut microbiota (39), we have shown that increased bacterial diversity  
440 (typically associated with health) can be achieved by simulating suboptimal growth rates under the  
441 hypothesis that disease progression correlates to a collective movement towards maximal growth.  
442 Therefore, the assumption of maximal community growth may inherently limit our ability to accurately

443 reproduce more diverse samples, and rather simulate conditions associated with disease, such as  
444 dominance of a single pathogen.

445 By optimizing cross-feeding of secreted metabolites, the community model was able to predict the  
446 coexistence of multiple species at the maximal community growth rate rather than just predicting a  
447 monoculture of the single species with the highest monoculture growth rate. Because the SteadyCom  
448 method (25) used to formulate and solve the community model does not allow direct incorporation of  
449 mechanisms by which one species could inhibit the growth of another species other than by nutrient  
450 competition, the predicted community growth rate always was greater than the highest individual growth  
451 rate of the coexisting species. Consequently, the formulated model was incapable was capturing more  
452 complex interactions such as *Pseudomonas* secretion of diffusible toxins that inhibit the growth of other  
453 CF pathogens (64).

454 Despite this limitation, the community model could be analyzed to understand the putative role of  
455 metabolite cross-feeding in shaping community composition. The model predicted that the rare pathogens  
456 *Escherichia* and *Burkholderia* were particularly efficient cross-feeders, using acetate, formate and other  
457 secreted metabolites to establish dominance over less harmful bacteria. By contrast, the model predicted  
458 *Achromobacter* to be substantially less adept at exploiting secreted metabolites for growth enhancement.  
459 While we were able to simulate *Achromobacter* dominance through addition of four carbon sources  
460 possibly present in the CF lung, the model suggested that other non-modeled mechanisms may be  
461 involved in promoting *Achromobacter* expansion. One possibility is that *Achromobacter* utilizes its  
462 ability to form multispecies biofilms (44, 65) to establish favorable metabolic niches for enhanced  
463 growth.

464 In the absence of the three rare pathogens, the model predicted that *Pseudomonas* would be the primary  
465 beneficiary of cross-fed metabolites including acetate, alanine and L-lactate from *Streptococcus* and  
466 aspartate, ethanol and formate from *Staphylococcus*. These complex cross-feeding relationships were an  
467 emergent property of the community model that could not predicted from monoculture simulations and

468 are consistent with published experimental data presented above. For example, the single-species models  
469 predicted that acetate, CO<sub>2</sub> and formate would be the primary secreted byproducts yet the community  
470 model also cross-fed ethanol, D-lactate, L-lactate and succinate which were not predicted to be secreted in  
471 any monoculture simulation. We hypothesized that model ensemble simulations with relatively high and  
472 low *Pseudomonas* abundances would show differential cross-feeding patterns. While some of the specific  
473 cross-fed metabolites changed between the two cases, cross-feeding from *Streptococcus* and  
474 *Staphylococcus* to *Pseudomonas* remained the dominant feature of the simulated communities. In our  
475 assimilated dataset of 75 patient samples, *Pseudomonas* reads were above 10% in 55 samples and above  
476 50% in 35 samples. Our model predictions provide putative metabolic mechanisms that may help explain  
477 why *Pseudomonas* so efficiently colonizes the adult CF lung and why *Pseudomonas* commonly  
478 establishes dominance over other species once colonized.

479 Our community metabolic model generated several predictions that could be tested experimentally with  
480 an appropriately designed *in vitro* community. For example, a 5-species *in vitro* system consisting of  
481 *Pseudomonas aeruginosa*, *Streptococcus sanguinis*, *Prevotella melaninogenica*, *Haemophilus influenzae*  
482 and *Staphylococcus aureus* would provide substantial coverage of our 16S rRNA gene sequencing data as  
483 the five genera account for 81% of reads across the 75 samples and greater than 75% of reads in 56  
484 samples. Specific model predictions that could be tested *in vitro* include the variability of community  
485 compositions by changing nutrient levels in a synthetic CF medium, and the cross-feeding of specific  
486 metabolites by genetically altering the secretion and/or uptake capabilities of these metabolites in the  
487 relevant species. The availability of such *in vitro* data linking the nutrient environment, cross-feeding  
488 mechanisms and community composition would allow direct testing of a simplified 5-species model and  
489 facilitate the development of improved community models for the analysis of CF sputum samples.

## 490 **Materials and Methods**

491 Patient Data: CF airway community composition data was obtained from three published studies in which  
492 patient sputum samples were subjected to 16S rRNA gene amplicon library sequencing (26-28). The

493 assimilated dataset contained 75 distinct samples from 46 patients who were clinically stable or recovered  
494 from treatment for an exacerbation event. Additional samples from these three studies corresponding to  
495 exacerbation or antibiotic treatment were not included in the modeled dataset to avoid the complications  
496 of predicting these events. The top 72 taxonomic groups (typically genera) accounted for over 99.8% of  
497 total reads across the 75 samples (Figure 1A; Table S1). To limit complexity, the community metabolic  
498 model described below was limited to 17 taxonomic groups that accounted for 95.6% of total reads  
499 (Figure 1B; Table S2). Reads from the family *Enterobacteriaceae* and the genus *Escherichia* were  
500 combined and represented as a single genus. To allow direct comparison with the species abundances  
501 predicted by the model, the reads for each sample were normalized over the 17 modeled genera to sum to  
502 unity (Table S3).

503 Community Metabolic Model: For simplicity, each genus was represented by a single species commonly  
504 observed in CF airway communities (1, 6-9, 66), although we note that genera such as *Streptococcus* (28)  
505 can have considerably diversity with respect to species representation. As mentioned above, the combined  
506 *Enterobacteriaceae/Escherichia* taxonomic group was represented by the single species *Escherichia coli*.  
507 A genome-scale metabolic reconstruction for each species (Figure 1C) was obtained from a large database  
508 of AGORA models (19) ([www.vmh.life](http://www.vmh.life)). Table 1 lists the representative strain used for each genus, the  
509 normalized reads fractionally associated with each genus averaged across the 75 samples (also shown in  
510 Figure 1B), and the number of samples for which the normalized reads exceeded 1%. The community  
511 model accounted for 13,845 genes, 19,034 metabolites and 22,412 reactions within the 17 species as well  
512 as 271 uptake and secretion reactions for the extracellular space shared by the species.

513 The genera *Pseudomonas*, *Streptococcus* and *Prevotella* dominated most communities, both in terms of  
514 average reads for individual samples and the number of samples in which they exceeded 1%.  
515 Interestingly, *Enterobacteriaceae/Escherichia*, *Burkholderia* and *Achromobacter* exceeded 0.1% in only  
516 single patients represented by 3, 3, and 2 samples, respectively. Moreover, no patients were infected by  
517 more than one of these “rare” pathogens, as the maximum reads of the other two pathogens never

518 exceeded 0.1% in these 8 samples. Therefore, for modeling purposes the 75 samples were partitioned  
519 into: 3 *Enterobacteriaceae/Escherichia*-containing samples with *Burkholderia* and *Achromobacter*  
520 absent; 3 *Burkholderia*-containing samples with *Enterobacteriaceae/Escherichia* and *Achromobacter*  
521 absent; 2 *Achromobacter*-containing samples with *Enterobacteriaceae/Escherichia* and *Burkholderia*  
522 absent; and 67 samples with all three rare pathogens absent.

523 Model Tuning and Simulation: The nutrient environment in the CF lung is complex and expected to vary  
524 between patients as well as between longitudinal samples for individual patients depending on disease  
525 state. While metabolomic analyses have been performed on CF sputum and bronchoscopy samples (40,  
526 60, 66, 67), these studies were insufficient to define supplied nutrients for the metabolic model due to  
527 their limited metabolite coverage. Furthermore, we found that based on our model, the synthetic sputum  
528 medium SCFM2 used in previous *in vitro* CF microbiota studies (63, 68) would not support growth of  
529 any of the 17 modeled species due to the lack of ions ( $\text{Co}^{2+}$ ,  $\text{Cu}^{2+}$ ,  $\text{Mn}^{2+}$ ,  $\text{Zn}^{2+}$ ), amino acids (asparagine,  
530 glutamine) and other metabolites (see below) essential for growth. While the medium likely would  
531 contain trace amounts of the missing ions, the requirement of these other metabolites for growth suggests  
532 limitations for the AGORA metabolic models with respect to biosynthetic pathways leading to biomass  
533 formation. Given the semi-curated nature of the AGORA models (19), such discrepancies were expected  
534 and had to be addressed by adding the missing essential metabolites to the modeled medium. A final  
535 complication was that the community model required specification of nutrient uptake rates, which were  
536 unknown even if medium component concentrations were specified due to the lack of species-dependent  
537 uptake kinetics for each nutrient. Because such uptake information is rarely available even for highly  
538 studied model organisms such as *Escherichia coli* (69), a simplified approach was used to define nutrient  
539 uptake rates for the community model.

540 Supplied nutrients in the community model were defined by starting with the SCFM2 medium and adding  
541 the four ions and two amino acids listed above. We found that each species required additional  
542 metabolites in the medium to support biomass formation. These 29 additional metabolites were identified

543 and added to the modeled medium such that all 17 species were capable of monoculture growth (see  
544 Table S4). For example, the *P. aeruginosa* model required addition of uracil and menaquinone 7, while *in*  
545 *vitro* experiments have shown that these metabolites are synthesized *de novo* and not required in the  
546 medium (63). Next, we added four carbon sources (fructose, maltose, maltotriose, pyruvate) and 8 other  
547 metabolites (adenosine, cytidine, glycerol, guanosine, hexadecanoate, inosine, octadecenoate, uridine)  
548 measured in the CF lung (67) and the terminal electron acceptor O<sub>2</sub> to simulate aerobic respiration.  
549 Finally, we added four additional carbon sources (arabinose, fumarate, galactonate, xylose) that increased  
550 *in silico* *Achromobacter* growth such that *Achromobacter* would be competitive with other species when  
551 it was present in the community. While these carbon sources were identified *in silico*, there is  
552 experimental evidence to support their inclusion in the simulated CF lung environment. Fumarate has  
553 been shown to be elevated in sputum samples from young CF patients (70). Arabinose and xylose are  
554 constituents of extracellular polymer substance (EPS) produced by common human pathogens including  
555 the modeled genera *Pseudomonas*, *Staphylococcus* and *Escherichia* (71), suggesting their possible  
556 presence in the CF lung. Pathogenic *Achromobacter* strains isolated from CF patients has been shown to  
557 grow on galactonate as a sole carbon source (72), supporting the hypothesis that *Achromobacter* has  
558 evolved to utilize galactonate available in the CF lung.

559 The community uptake rates of the 86 supplied nutrients were tuned by trial-and-error to produce species  
560 abundances in approximate agreement with the average reads listed in Table 1, which were derived from  
561 actual patient samples. To reduce the number of adjustable rates, the nutrients were grouped together and  
562 a single uptake rate was used for each group. These 14 groups were defined as: (1) 16 common metals  
563 and ions; (2) 29 essential growth metabolites; (3) 8 CF lung metabolites; (4) 19 amino acids; (5) the  
564 amino acids alanine and valine, which have been reported to be elevated in the CF lung compared to other  
565 amino acids (67); (6)-(11) each of the 6 carbon sources available in the CF lung; (12) O<sub>2</sub>; (13) NO<sub>3</sub>; and  
566 (14) 4 *Achromobacter*-related carbon sources. The 86 nutrients and their nominal community uptake rates  
567 determined through this tuning procedure are listed in Table S4 and depicted graphically in Figure 1D.



568 Because these nutrient uptakes rates were derived for the entire patient population and not an individual  
569 patient sample, a different strategy was used to simulate sample-to-sample heterogeneity based on the  
570 hypothesis that differences in nutrient availability could account for heterogeneity in measured reads.  
571 Individual patient samples were simulated by randomly perturbing the community uptake rate for each of  
572 the 14 nutrient groups listed above between 33% and 300% of its nominal value. Uniformly distributed  
573 random numbers were generated for each group such that the number of cases with the uptake rates in the  
574 range [33%-100%) and [100%-300%] were statistically equal. The bounds used for the uptake rate of  
575 each metabolite also are listed in Table S4.

576 Community Simulations: We used the SteadyCom method (25) to perform community simulations as  
577 detailed in our previous study on the human gut microbiota (39). SteadyCom performs community flux  
578 balance analysis by computing the relative abundance of each species for maximal community growth  
579 while ensuring that all metabolites are properly balanced within each species and across the community.  
580 Each species model used a non-growth associated ATP maintenance (ATPM) value of 5 mmol/gDW/h,  
581 which is within the range reported for curated bacterial reconstructions. Cross-feeding of all 21 amino  
582 acids and 8 common metabolic byproducts (acetate, CO<sub>2</sub>, ethanol, formate, H<sub>2</sub>, D-lactate, L-lactate,  
583 succinate) was promoted by increasing the maximum nutrient uptake rates of these nutrients in each  
584 species model to 2.5 and 5 mmol/gDW/h, respectively. Outputs of each SteadyCom simulation included  
585 the community growth rate, the abundance of each species, and species-dependent uptake and secretion  
586 rates of each extracellular metabolite. The nominal nutrient uptake rates produced a single community not  
587 directly comparable to any single patient sample (Figure 1E), while each set of randomized uptake rates  
588 produced a unique community that was interpreted as a prediction of an individual patient sample (Figure  
589 1F).

#### 590 **Data availability**

591 All data used for metabolic model development and testing is provided in the Supplemental Material.

#### 592 **Acknowledgements**

593 The authors wish to acknowledge the NIH grants R37 AI83256-06 (GAO) and T32-AI007519 (GO) for  
594 partial support of this research.

## 595 **References**

- 596 1. Lyczak JB, Cannon CL, Pier GB. Lung infections associated with cystic fibrosis. *Clinical*  
597 *microbiology reviews*. 2002;15(2):194-222.
- 598 2. Tang AC, Turvey SE, Alves MP, Regamey N, Tümmler B, Hartl D. Current concepts: host–  
599 pathogen interactions in cystic fibrosis airways disease. *European Respiratory Review*.  
600 2014;23(133):320-32.
- 601 3. Bronstein M, Sokol R, Abman S, Chatfield B, Hammond K, Hambidge K, Stall C, Accurso F.  
602 Pancreatic insufficiency, growth, and nutrition in infants identified by newborn screening as having cystic  
603 fibrosis. *The Journal of pediatrics*. 1992;120(4):533-40.
- 604 4. Orrskog S, Medin E, Tsoлова S, Semenza JC. Causal inference regarding infectious aetiology of  
605 chronic conditions: a systematic review. *PLoS One*. 2013;8(7):e68861.
- 606 5. Govan J, Nelson J. Microbiology of cystic fibrosis lung infections: themes and issues. *Journal of*  
607 *the Royal Society of Medicine*. 1993;86(Suppl 20):11.
- 608 6. LiPuma JJ. The changing microbial epidemiology in cystic fibrosis. *Clinical microbiology*  
609 *reviews*. 2010;23(2):299-323.
- 610 7. Filkins LM, O’Toole GA. Cystic fibrosis lung infections: polymicrobial, complex, and hard to  
611 treat. *PLoS pathogens*. 2015;11(12):e1005258.
- 612 8. Lynch SV, Bruce KD. The cystic fibrosis airway microbiome. *Cold Spring Harbor perspectives*  
613 *in medicine*. 2013;3(3):a009738.
- 614 9. Van Der Gast CJ, Walker AW, Stressmann FA, Rogers GB, Scott P, Daniels TW, Carroll MP,  
615 Parkhill J, Bruce KD. Partitioning core and satellite taxa from within cystic fibrosis lung bacterial  
616 communities. *The ISME journal*. 2011;5(5):780.

- 617 10. O'Toole GA. Cystic Fibrosis Airway Microbiome: Overturning the Old, Opening the Way for the  
618 New. *Journal of bacteriology*. 2018;200(4):e00561-17.
- 619 11. Perez-Garcia O, Lear G, Singhal N. Metabolic network modeling of microbial interactions in  
620 natural and engineered environmental systems. *Frontiers in microbiology*. 2016;7:673.
- 621 12. Hanemaaijer M, Röling WF, Olivier BG, Khandelwal RA, Teusink B, Bruggeman FJ. Systems  
622 modeling approaches for microbial community studies: from metagenomics to inference of the  
623 community structure. *Frontiers in microbiology*. 2015;6:213.
- 624 13. Freilich S, Zarecki R, Eilam O, Segal ES, Henry CS, Kupiec M, Gophna U, Sharan R, Ruppin E.  
625 Competitive and cooperative metabolic interactions in bacterial communities. *Nature communications*.  
626 2011;2:589.
- 627 14. Shoaie S, Karlsson F, Mardinoglu A, Nookaew I, Bordel S, Nielsen J. Understanding the  
628 interactions between bacteria in the human gut through metabolic modeling. *Scientific reports*.  
629 2013;3:2532.
- 630 15. Heinken A, Thiele I. Anoxic conditions promote species-specific mutualism between gut  
631 microbes in silico. *Applied and environmental microbiology*. 2015:AEM. 00101-15.
- 632 16. Levy R, Borenstein E. Metabolic modeling of species interaction in the human microbiome  
633 elucidates community-level assembly rules. *Proceedings of the National Academy of Sciences*.  
634 2013;110(31):12804-9.
- 635 17. Pinto F, Medina DA, Pérez-Correa JR, Garrido D. Modeling metabolic interactions in a  
636 consortium of the infant gut microbiome. *Frontiers in microbiology*. 2017;8:2507.
- 637 18. Cuevas DA, Edirisinghe J, Henry CS, Overbeek R, O'Connell TG, Edwards RA. From DNA to  
638 FBA: how to build your own genome-scale metabolic model. *Frontiers in microbiology*. 2016;7:907.
- 639 19. Magnúsdóttir S, Heinken A, Kutt L, Ravcheev DA, Bauer E, Noronha A, Greenhalgh K, Jäger C,  
640 Baginska J, Wilmes P. Generation of genome-scale metabolic reconstructions for 773 members of the  
641 human gut microbiota. *Nature biotechnology*. 2017;35(1):81.

- 642 20. Faria JP, Rocha M, Rocha I, Henry CS. Methods for automated genome-scale metabolic model  
643 reconstruction. *Biochemical Society Transactions*. 2018;46(4):931-6.
- 644 21. Khandelwal RA, Olivier BG, Röling WF, Teusink B, Bruggeman FJ. Community flux balance  
645 analysis for microbial consortia at balanced growth. *PLoS one*. 2013;8(5):e64567.
- 646 22. Zomorodi AR, Maranas CD. OptCom: a multi-level optimization framework for the metabolic  
647 modeling and analysis of microbial communities. *PLoS computational biology*. 2012;8(2):e1002363.
- 648 23. Heinken A, Thiele I. Systematic prediction of health-relevant human-microbial co-metabolism  
649 through a computational framework. *Gut Microbes*. 2015;6(2):120-30.
- 650 24. Shoaie S, Ghaffari P, Kovatcheva-Datchary P, Mardinoglu A, Sen P, Pujos-Guillot E, De  
651 Wouters T, Juste C, Rizkalla S, Chilloux J. Quantifying diet-induced metabolic changes of the human gut  
652 microbiome. *Cell metabolism*. 2015;22(2):320-31.
- 653 25. Chan SHJ, Simons MN, Maranas CD. SteadyCom: Predicting microbial abundances while  
654 ensuring community stability. *PLoS computational biology*. 2017;13(5):e1005539.
- 655 26. Hampton TH, Green DM, Cutting GR, Morrison HG, Sogin ML, Gifford AH, Stanton BA,  
656 O'Toole GA. The microbiome in pediatric cystic fibrosis patients: the role of shared environment  
657 suggests a window of intervention. *Microbiome*. 2014;2(1):14.
- 658 27. Price KE, Hampton TH, Gifford AH, Dolben EL, Hogan DA, Morrison HG, Sogin ML, O'Toole  
659 GA. Unique microbial communities persist in individual cystic fibrosis patients throughout a clinical  
660 exacerbation. *Microbiome*. 2013;1(1):27.
- 661 28. Filkins L, Hampton T, Gifford A, Gross M, Hogan D, Sogin M, Morrison H, Paster B, O'Toole  
662 G. The prevalence of *Streptococci* and increased polymicrobial diversity associated with cystic fibrosis  
663 patient stability. *Journal of bacteriology*. 2012;JB. 00566-12.
- 664 29. Bartell JA, Blazier AS, Yen P, Thøgersen JC, Jelsbak L, Goldberg JB, Papin JA. Reconstruction  
665 of the metabolic network of *Pseudomonas aeruginosa* to interrogate virulence factor synthesis. *Nature*  
666 *communications*. 2017;8:14631.

- 667 30. Oberhardt MA, Goldberg JB, Hogardt M, Papin JA. Metabolic network analysis of *Pseudomonas*  
668 *aeruginosa* during chronic cystic fibrosis lung infection. *Journal of bacteriology*. 2010;192(20):5534-48.
- 669 31. Heinemann M, Kümmel A, Ruinatscha R, Panke S. In silico genome-scale reconstruction and  
670 validation of the *Staphylococcus aureus* metabolic network. *Biotechnology and bioengineering*.  
671 2005;92(7):850-64.
- 672 32. Bosi E, Monk JM, Aziz RK, Fondi M, Nizet V, Palsson BØ. Comparative genome-scale  
673 modelling of *Staphylococcus aureus* strains identifies strain-specific metabolic capabilities linked to  
674 pathogenicity. *Proceedings of the National Academy of Sciences*. 2016;113(26):E3801-E9.
- 675 33. Fang K, Zhao H, Sun C, Lam CM, Chang S, Zhang K, Panda G, Godinho M, dos Santos VAM,  
676 Wang J. Exploring the metabolic network of the epidemic pathogen *Burkholderia cenocepacia* J2315 via  
677 genome-scale reconstruction. *BMC systems biology*. 2011;5(1):83.
- 678 34. Bartell JA, Yen P, Varga JJ, Goldberg JB, Papin JA. Comparative metabolic systems analysis of  
679 pathogenic *Burkholderia*. *Journal of bacteriology*. 2014;196(2):210-26.
- 680 35. Noecker C, Eng A, Srinivasan S, Theriot CM, Young VB, Jansson JK, Fredricks DN, Borenstein  
681 E. Metabolic model-based integration of microbiome taxonomic and metabolomic profiles elucidates  
682 mechanistic links between ecological and metabolic variation. *MSystems*. 2016;1(1):e00013-15.
- 683 36. Magnúsdóttir S, Thiele I. Modeling metabolism of the human gut microbiome. *Current opinion*  
684 *in biotechnology*. 2018;51:90-6.
- 685 37. Heinken A, Ravcheev DA, Baldini F, Heirendt L, Fleming RM, Thiele I. Personalized modeling  
686 of the human gut microbiome reveals distinct bile acid deconjugation and biotransformation potential in  
687 healthy and IBD individuals. *BioRxiv*. 2017:229138.
- 688 38. Hogan DA, Willger SD, Dolben EL, Hampton TH, Stanton BA, Morrison HG, Sogin ML, Czum  
689 J, Ashare A. Analysis of lung microbiota in bronchoalveolar lavage, protected brush and sputum samples  
690 from subjects with mild-to-moderate cystic fibrosis lung disease. *PLoS one*. 2016;11(3):e0149998.
- 691 39. Henson MA, Phalak P. Suboptimal community growth mediated through metabolite crossfeeding  
692 promotes species diversity in the gut microbiota. *PLoS computational biology*. 2018;14(10):e1006558.

- 693 40. Quinn RA, Phelan VV, Whiteson KL, Garg N, Bailey BA, Lim YW, Conrad DJ, Dorrestein PC,  
694 Rohwer FL. Microbial, host and xenobiotic diversity in the cystic fibrosis sputum metabolome. *The ISME*  
695 *journal*. 2016;10(6):1483.
- 696 41. Nobakht M, Gh BF, Aliannejad R, Rezaei-Tavirani M, Taheri S, Oskouie AA. The metabolomics  
697 of airway diseases, including COPD, asthma and cystic fibrosis. *Biomarkers*. 2015;20(1):5-16.
- 698 42. Quinn RA, Lim YW, Mak TD, Whiteson K, Furlan M, Conrad D, Rohwer F, Dorrestein P.  
699 Metabolomics of pulmonary exacerbations reveals the personalized nature of cystic fibrosis disease.  
700 *PeerJ*. 2016;4:e2174.
- 701 43. Flynn JM, Niccum D, Dunitz JM, Hunter RC. Evidence and role for bacterial mucin degradation  
702 in cystic fibrosis airway disease. *PLoS pathogens*. 2016;12(8):e1005846.
- 703 44. Abdouchakour F, Dupont C, Grau D, Aujoulat F, Mournetas P, Marchandin H, Parer S, Gibert P,  
704 Valcarcel J, Jumas-Bilak E. *Pseudomonas aeruginosa* and *Achromobacter* sp. clonal selection leads to  
705 successive waves of contamination of water in dental care units. *Applied and environmental*  
706 *microbiology*. 2015;81(21):7509-24.
- 707 45. Lambiase A, Catania MR, del Pezzo M, Rossano F, Terlizzi V, Sepe A, Raia V. *Achromobacter*  
708 *xylooxidans* respiratory tract infection in cystic fibrosis patients. *European journal of clinical*  
709 *microbiology & infectious diseases*. 2011;30(8):973-80.
- 710 46. Li K, Bihan M, Yooseph S, Methe BA. Analyses of the microbial diversity across the human  
711 microbiome. *PloS one*. 2012;7(6):e32118.
- 712 47. Filkins LM, Graber JA, Olson DG, Dolben EL, Lynd LR, Bhuju S, O'Toole GA. Co-culture of  
713 *Staphylococcus aureus* with *Pseudomonas aeruginosa* drives *S. aureus* towards fermentative metabolism  
714 and reduced viability in a cystic fibrosis model. *Journal of bacteriology*. 2015:JB. 00059-15.
- 715 48. Cox MJ, Allgaier M, Taylor B, Baek MS, Huang YJ, Daly RA, Karaoz U, Andersen GL, Brown  
716 R, Fujimura KE. Airway microbiota and pathogen abundance in age-stratified cystic fibrosis patients.  
717 *PloS one*. 2010;5(6):e11044.

- 718 49. Mahadevan R, Schilling C. The effects of alternate optimal solutions in constraint-based genome-  
719 scale metabolic models. *Metabolic engineering*. 2003;5(4):264-76.
- 720 50. Thomas TD, Ellwood DC, Longyear VMC. Change from homo-to heterolactic fermentation by  
721 *Streptococcus lactis* resulting from glucose limitation in anaerobic chemostat cultures. *Journal of*  
722 *bacteriology*. 1979;138(1):109-17.
- 723 51. Keevil C, Marsh P, Ellwood D. Regulation of glucose metabolism in oral *streptococci* through  
724 independent pathways of glucose 6-phosphate and glucose 1-phosphate formation. *Journal of*  
725 *bacteriology*. 1984;157(2):560-7.
- 726 52. Palmer KL, Mashburn LM, Singh PK, Whiteley M. Cystic fibrosis sputum supports growth and  
727 cues key aspects of *Pseudomonas aeruginosa* physiology. *Journal of bacteriology*. 2005;187(15):5267-  
728 77.
- 729 53. Rossi E, Falcone M, Molin S, Johansen HK. High-resolution in situ transcriptomics of  
730 *Pseudomonas aeruginosa* unveils genotype independent patho-phenotypes in cystic fibrosis lungs. *Nature*  
731 *communications*. 2018;9(1):3459.
- 732 54. Lysenko O. *Pseudomonas*—an attempt at a general classification. *Microbiology*. 1961;25(3):379-  
733 408.
- 734 55. Sonnleitner E, Valentini M, Wenner N, el Zahar Haichar F, Haas D, Lapouge K. Novel targets of  
735 the CbrAB/Crc carbon catabolite control system revealed by transcript abundance in *Pseudomonas*  
736 *aeruginosa*. *PloS one*. 2012;7(10):e44637.
- 737 56. Korgaonkar A, Trivedi U, Rumbaugh KP, Whiteley M. Community surveillance enhances  
738 *Pseudomonas aeruginosa* virulence during polymicrobial infection. *Proceedings of the National Academy*  
739 *of Sciences*. 2013;110(3):1059-64.
- 740 57. Whiteson KL, Meinardi S, Lim YW, Schmieder R, Maughan H, Quinn R, Blake DR, Conrad D,  
741 Rohwer F. Breath gas metabolites and bacterial metagenomes from cystic fibrosis airways indicate active  
742 pH neutral 2, 3-butanedione fermentation. *The ISME journal*. 2014;8(6):1247.

- 743 58. Lin Y-C, Cornell WC, Jo J, Price-Whelan A, Dietrich LE. The *Pseudomonas aeruginosa*  
744 complement of lactate dehydrogenases enables use of d- and l-lactate and metabolic cross-feeding. *MBio*.  
745 2018;9(5):e00961-18.
- 746 59. Scoffield JA, Wu H. Oral *Streptococci* and nitrite-mediated interference of *Pseudomonas*  
747 *aeruginosa*. *Infection and Immunity*. 2015;83(1):101-7.
- 748 60. Muhlebach MS, Sha W. Lessons learned from metabolomics in cystic fibrosis. *Molecular and*  
749 *Cellular Pediatrics*. 2015;2(1):9.
- 750 61. Li J, Jia H, Cai X, Zhong H, Feng Q, Sunagawa S, Arumugam M, Kultima JR, Prifti E, Nielsen  
751 T. An integrated catalog of reference genes in the human gut microbiome. *Nature Biotechnology*.  
752 2014;32(8):834.
- 753 62. Wolcott RD, Hanson JD, Rees EJ, Koenig LD, Phillips CD, Wolcott RA, Cox SB, White JS.  
754 Analysis of the chronic wound microbiota of 2,963 patients by 16S rDNA pyrosequencing. *Wound Repair*  
755 *and Regeneration*. 2016;24(1):163-74.
- 756 63. Palmer KL, Aye LM, Whiteley M. Nutritional cues control *Pseudomonas aeruginosa*  
757 multicellular behavior in cystic fibrosis sputum. *Journal of Bacteriology*. 2007;189(22):8079-87.
- 758 64. O'Brien S, Fothergill JL. The role of multispecies social interactions in shaping *Pseudomonas*  
759 *aeruginosa* pathogenicity in the cystic fibrosis lung. *FEMS Microbiology Letters*. 2017;364(15).
- 760 65. Firmida MC, Marques EA, Leao RS, Pereira RHV, Rodrigues ERA, Albano RM, Folescu TW,  
761 Bernardo V, Daltro P, Capone D. *Achromobacter xylosoxidans* infection in cystic fibrosis siblings with  
762 different outcomes. *Respiratory Medicine Case Reports*. 2017;20:98-103.
- 763 66. Quinn RA, Lim YW, Maughan H, Conrad D, Rohwer F, Whiteson KL. Biogeochemical forces  
764 shape the composition and physiology of polymicrobial communities in the cystic fibrosis lung. *MBio*.  
765 2014;5(2):e00956-13.
- 766 67. Twomey KB, Alston M, An S-Q, O'Connell OJ, McCarthy Y, Swarbreck D, Febrer M, Dow JM,  
767 Plant BJ, Ryan RP. Microbiota and metabolite profiling reveal specific alterations in bacterial community



768 structure and environment in the cystic fibrosis airway during exacerbation. *PLoS One*.  
769 2013;8(12):e82432.

770 68. Turner KH, Wessel AK, Palmer GC, Murray JL, Whiteley M. Essential genome of *Pseudomonas*  
771 *aeruginosa* in cystic fibrosis sputum. *Proceedings of the National Academy of Sciences*.  
772 2015;112(13):4110-5.

773 69. Meadows AL, Karnik R, Lam H, Forestell S, Snedecor B. Application of dynamic flux balance  
774 analysis to an industrial *Escherichia coli* fermentation. *Metabolic engineering*. 2010;12(2):150-60.

775 70. Esther CR, Turkovic L, Rosenow T, Muhlebach MS, Boucher RC, Ranganathan S, Stick SM.  
776 Metabolomic biomarkers predictive of early structural lung disease in cystic fibrosis. *European*  
777 *Respiratory Journal*. 2016;48(6):1612-21.

778 71. Bales PM, Renke EM, May SL, Shen Y, Nelson DC. Purification and characterization of biofilm-  
779 associated EPS exopolysaccharides from ESKAPE organisms and other pathogens. *PloS one*.  
780 2013;8(6):e67950.

781 72. Li X, Hu Y, Gong J, Zhang L, Wang G. Comparative genome characterization of *Achromobacter*  
782 members reveals potential genetic determinants facilitating the adaptation to a pathogenic lifestyle.  
783 *Applied microbiology and biotechnology*. 2013;97(14):6413-25.

784

785 **List of Tables**

- 786 1. CF genera analyzed. Shown is a list of the 17 species/strains included in the CF airway community  
787 model, the normalized fractional reads for the associated genera averaged across the 75 samples, and  
788 the percentage of samples in which the normalized reads exceeded 1%.

789 **List of Figures**

- 790 1. Overview of the community metabolic modeling framework driven by patient microbiota  
791 composition data. (A) 16S rRNA gene sequence data for 46 patients averaged across 75 distinct  
792 samples for the 72 highest ranked taxonomic groups (typically genera). (B) 16S rRNA gene sequence  
793 data for the 17 highest ranked taxonomic groups normalized to sum to unity and then averaged across  
794 the 75 samples. The error bars represent the variances of the normalized read data. (C) AGORA strain  
795 models (19) selected for 17 species that represent each taxonomic group. (D) Definition of the  
796 nutrient environment through specification of the community uptake rate of each extracellular  
797 metabolite. (E) Species abundances predicted from a SteadyCom (25) simulation with nominal  
798 community uptake rates compared to normalized reads for a random patient sample. (F) Average  
799 species abundances predicted from an ensemble of SteadyCom simulations with randomized  
800 community uptake rates compared to normalized reads averaged across the patient samples.
- 801 2. PCA performed on the normalized read data. (A) PCA performed for all 75 samples with the  
802 normalized reads for each taxonomic group plotted using the first three principle components (PCs)  
803 that explained 57.3%, 12.3% and 8.2%, respectively, of the data variance. Sample points for  
804 *Enterobacteriaceae*, *Burkholderia* and *Achromobacter* appeared as outliers. (B) PCA performed for  
805 67 samples when the 8 samples containing *Enterobacteriaceae*, *Burkholderia* and *Achromobacter*  
806 were removed. The normalized reads for each taxonomic group were plotted using the first two PCs  
807 that explained 72.6%, and 11.7%, respectively, of the data variance.
- 808 3. Single-species and community simulations performed with the nominal nutrient uptake rates in Table  
809 S3. (A) Single-species growth rates with the species numbered according to Table 1. (B) Comparison

810 of predicted species abundances to the average of the normalized reads for the single patient infected  
811 with *Enterobacteriaceae/Escherichia* (samples 25-27). (C) Comparison of predicted species  
812 abundances to the average of the normalized reads for the single patient infected with *Burkholderia*  
813 (samples 19-21). (D) Comparison of predicted species abundances to the average of the normalized  
814 reads for the single patient infected with *Achromobacter* (samples 31, 32). (E) Comparison of  
815 predicted species abundances to the average of the normalized reads for the 43 patients not infected  
816 with *Enterobacteriaceae/Escherichia*, *Burkholderia* or *Achromobacter* (samples 1-18, 22-24, 28-30,  
817 33-75).

818 4. Taxonomic reads for patient samples containing rare pathogens compared to species abundances  
819 predicted from community models with randomized nutrient uptake rates. The genera *Pseudomonas*,  
820 *Streptococcus*, *Prevotella*, *Haemophilus* and *Staphylococcus* and the indicated rare pathogen  
821 (*Enterobacteriaceae/Escherichia*, *Burkholderia* or *Achromobacter*) are shown for each case. (A)  
822 Individual models that best fit the 3 *Enterobacteriaceae/Escherichia*-containing samples 25-27  
823 selected from an ensemble of 100 15-species models without *Burkholderia* or *Achromobacter*. (B)  
824 Individual models that best fit the 3 *Burkholderia*-containing samples 19-21 selected from an  
825 ensemble of 100 15-species models without *Enterobacteriaceae/Escherichia* or *Achromobacter*. (C)  
826 Individual models that best fit the 2 *Achromobacter*-containing samples 31 and 32 selected from an  
827 ensemble of 100 15-species models without *Enterobacteriaceae/Escherichia* or *Burkholderia*. Each  
828 abundance for a patient sample is shown in the first bar and each abundance predicted by the  
829 corresponding model is shown in the second bar with red outline.

830 5. Taxonomic reads for patient samples without rare pathogens compared to species abundances  
831 predicted from community models with randomized nutrient uptake rates. The genera *Pseudomonas*,  
832 *Streptococcus*, *Prevotella*, *Haemophilus* and *Staphylococcus* and the next most abundant genera are  
833 shown for each case. Individual models that best fit the 67 patient samples were selected from an  
834 ensemble of 1000 14-species models without *Enterobacteriaceae/Escherichia*, *Burkholderia* or

835 *Achromobacter*. (A) Three representative samples for which the least-squares error measures were  
836 within the smallest third of all samples. (B) Three representative samples for which the least-squares  
837 error measures were within the middle third of all samples. (C) Three representative samples for  
838 which the least-squares error measures were within the largest third of all samples. Each abundance  
839 for a patient sample is shown in the first bar and each abundance predicted by the corresponding  
840 model is shown in the second bar with red outline.

841 6. Principal component analysis (PCA) of taxonomic reads for patient samples without rare pathogens  
842 and species abundances predicted from 14-species community models with randomized nutrient  
843 uptake rates. (A) Representation of the 67 patient samples in the two-dimensional space defined by  
844 the first two principal components (PCs) obtained when PCA is performed on the normalized reads of  
845 these patient samples. Species abundances predicted from an ensemble of 1000 models transformed  
846 into the PC space of the normalized read data. (B) Enlarged view of the lower left portion of the PCA  
847 plot in Figure 6A. (C) Average genera reads obtained for 8 samples (5, 6, 10, 39, 42, 43, 49, 57, 61,  
848 68, 70, 74) in Figure 6B with elevated *Prevotella* representation compared to the average abundances  
849 predicted from the best-fit models for these 8 samples with the species number as in Table 1.

850 7. Predicted metabolite crossfeeding relationships for 15-species communities containing *Escherichia*,  
851 *Burkholderia* or *Achromobacter*. Negative rates denote metabolite uptake and positive rates denote  
852 metabolite secretion. The overall metabolite exchange rate from one species to another species was  
853 calculated by determining the minimum uptake or secretion rate for each exchanged metabolite and  
854 then summing these minimum rates over all exchanged metabolites. The arrow thickness is  
855 proportional to the overall metabolite exchange rate between the two species. (A) Average exchange  
856 rates of the five highest crossfed metabolites between the three most abundant species for 100 model  
857 ensemble simulations containing *Escherichia*. (B) Average exchange rates of the five highest crossfed  
858 metabolites between the three most abundant species for 100 model ensemble simulations containing  
859 *Burkholderia*. (C) Average exchange rates of the five highest crossfed metabolites between the three

860 most abundant species for 100 model ensemble simulations containing *Achromobacter*. (D)  
861 Schematic representation of overall metabolite exchange rates for *Escherichia*-containing  
862 communities corresponding to Figure 7A. *Pseudomonas* was omitted due to its low exchange rates  
863 compared to the other two species. (E) Schematic representation of overall metabolite exchange rates  
864 for *Burkholderia*-containing communities corresponding to Figure 7B. (F) Schematic representation  
865 of overall metabolite exchange rates for *Achromobacter*-containing communities corresponding to  
866 Figure 7C.

867 8. Predicted metabolite crossfeeding relationships for 14-species communities without *Escherichia*,  
868 *Burkholderia* and *Achromobacter*. 1000 model ensemble simulations were performed and split into  
869 500 cases with relatively high *Pseudomonas* abundances and 500 cases with relatively low  
870 *Pseudomonas* abundances. (A) Average abundances of the five most highly represented species for  
871 the high and low *Pseudomonas* abundance cases. (B) Average exchange rates of the five highest  
872 crossfed metabolites between the four most abundant species for high *Pseudomonas* abundance cases.  
873 (C) Average exchange rates of the five highest crossfed metabolites between the four most abundant  
874 species the low *Pseudomonas* abundance cases. (D) Schematic representation of overall metabolite  
875 exchange rates for high *Pseudomonas* abundance cases corresponding to Figure 8B. (E) Schematic  
876 representation of overall metabolite exchange rates for low *Pseudomonas* abundance cases  
877 corresponding to Figure 8C.

878

879 **Table 1. CF genera analyzed.** Shown is a list of the 17 species/strains included in the CF airway  
 880 community model, the normalized fractional reads for the associated genera averaged across the 75  
 881 samples, and the percentage of samples in which the normalized reads exceeded 1%.

| <b>Species Number</b> | <b>Species Strain Name</b>                                        | <b>Average Reads</b> | <b>Sample Reads &gt; 1%</b> |
|-----------------------|-------------------------------------------------------------------|----------------------|-----------------------------|
| 1                     | <i>Pseudomonas aeruginosa</i> NCGM2.S1                            | 0.447                | 85.3%                       |
| 2                     | <i>Streptococcus sanguinis</i> SK36                               | 0.213                | 88.0%                       |
| 3                     | <i>Prevotella melaninogenica</i> ATCC 25845                       | 0.098                | 74.7%                       |
| 4                     | <i>Escherichia coli</i> str. K-12 substr. MG1655                  | 0.029                | 4.0%                        |
| 5                     | <i>Haemophilus influenzae</i> R2846                               | 0.028                | 22.7%                       |
| 6                     | <i>Burkholderia cepacia</i> GG4                                   | 0.026                | 4.0%                        |
| 7                     | <i>Rothia mucilaginosa</i> DY-18                                  | 0.026                | 48.0%                       |
| 8                     | <i>Fusobacterium nucleatum</i> subsp. <i>nucleatum</i> ATCC 25586 | 0.023                | 26.7%                       |
| 9                     | <i>Staphylococcus aureus</i> subsp. <i>aureus</i> USA300 FPR3757  | 0.023                | 34.7%                       |
| 10                    | <i>Veillonella atypica</i> ACS-049-V-Sch6                         | 0.016                | 48.0%                       |
| 11                    | <i>Achromobacter xylosoxidans</i> NBRC 15126                      | 0.014                | 2.7%                        |
| 12                    | <i>Gemella haemolysans</i> ATCC 10379                             | 0.015                | 30.7%                       |
| 13                    | <i>Granulicatella adiacens</i> ATCC 49175                         | 0.012                | 36.0%                       |
| 14                    | <i>Neisseria flavescens</i> SK114                                 | 0.008                | 18.7%                       |
| 15                    | <i>Actinomyces naeslundii</i> str. Howell 279                     | 0.009                | 21.3%                       |
| 16                    | <i>Porphyromonas endodontalis</i> ATCC 35406                      | 0.006                | 20.0%                       |
| 17                    | <i>Ralstonia</i> sp 5 7 47FAA                                     | 0.004                | 6.7%                        |

882

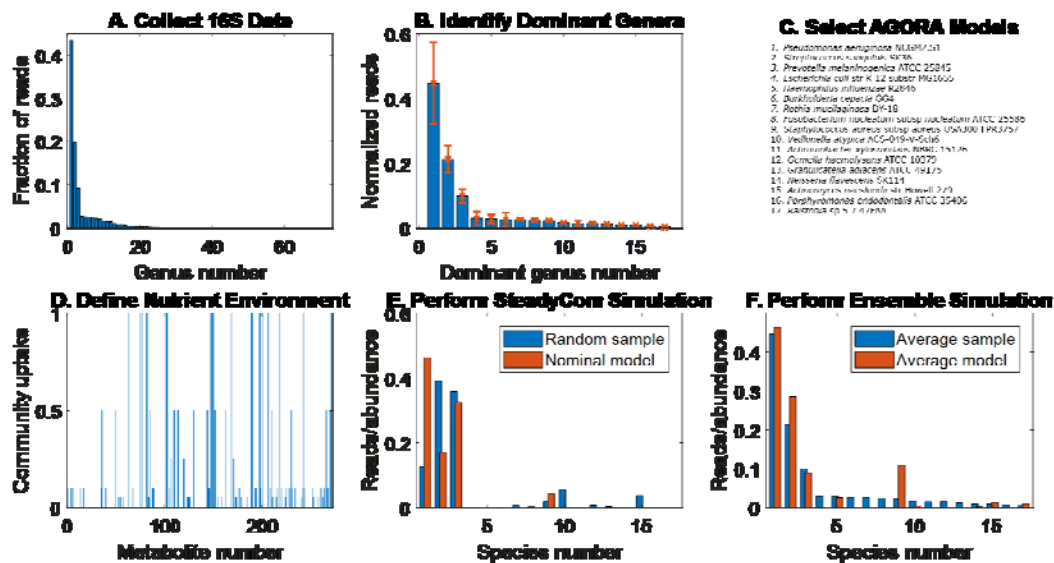

883

884

Figure 1

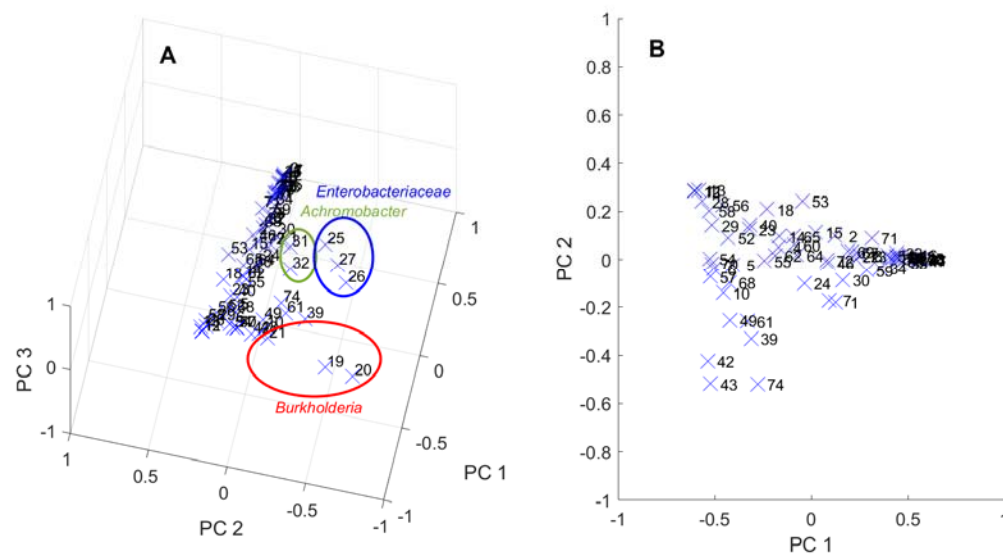

885

886

Figure 2

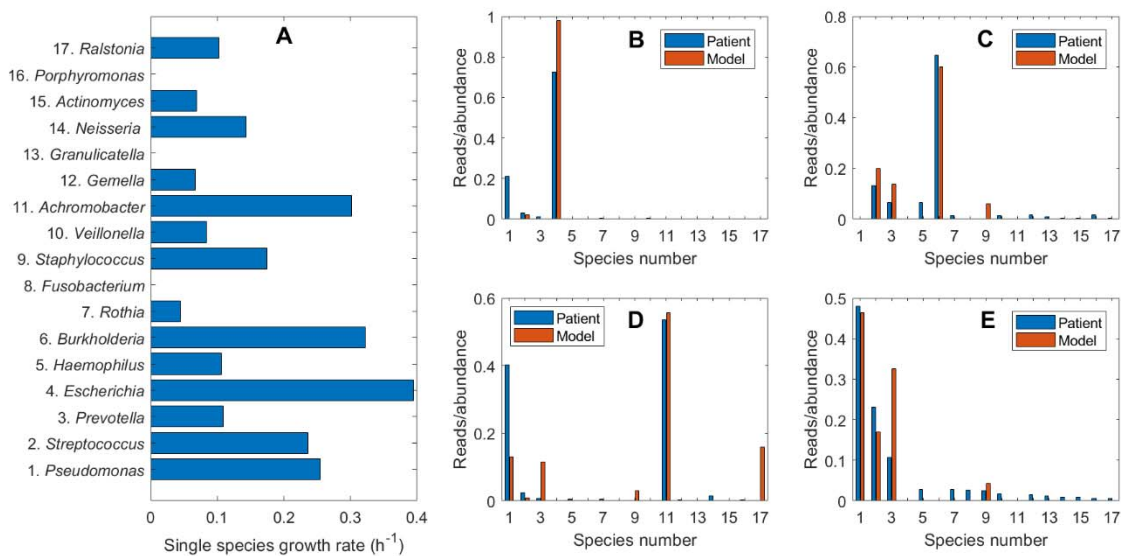

887

888

**Figure 3**

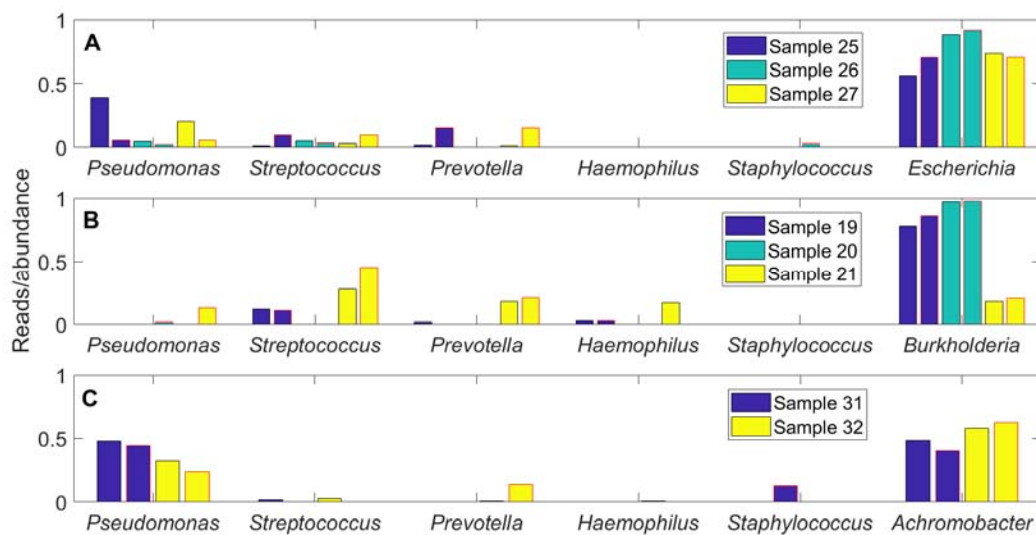

889

890

**Figure 4**



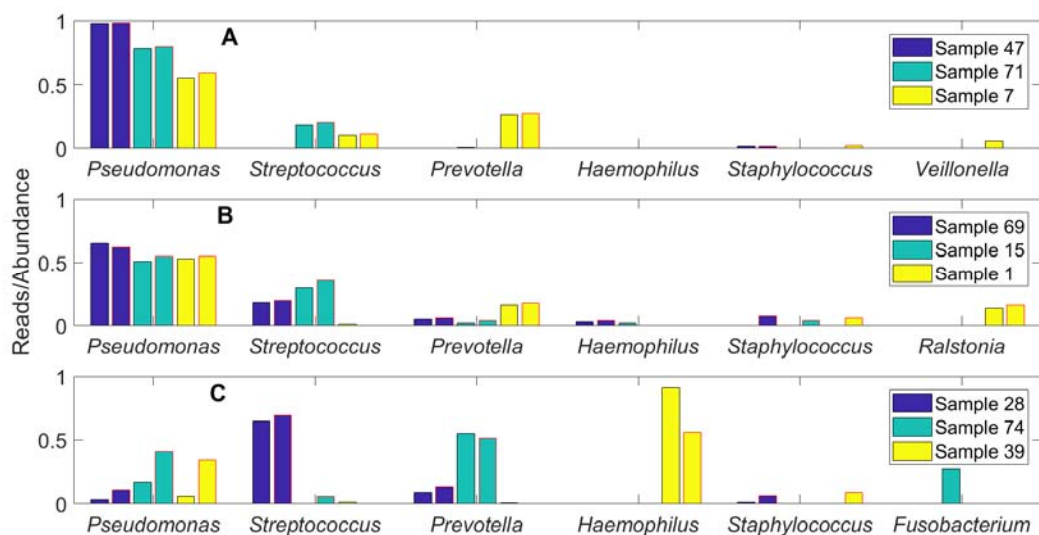

891

892

Figure 5

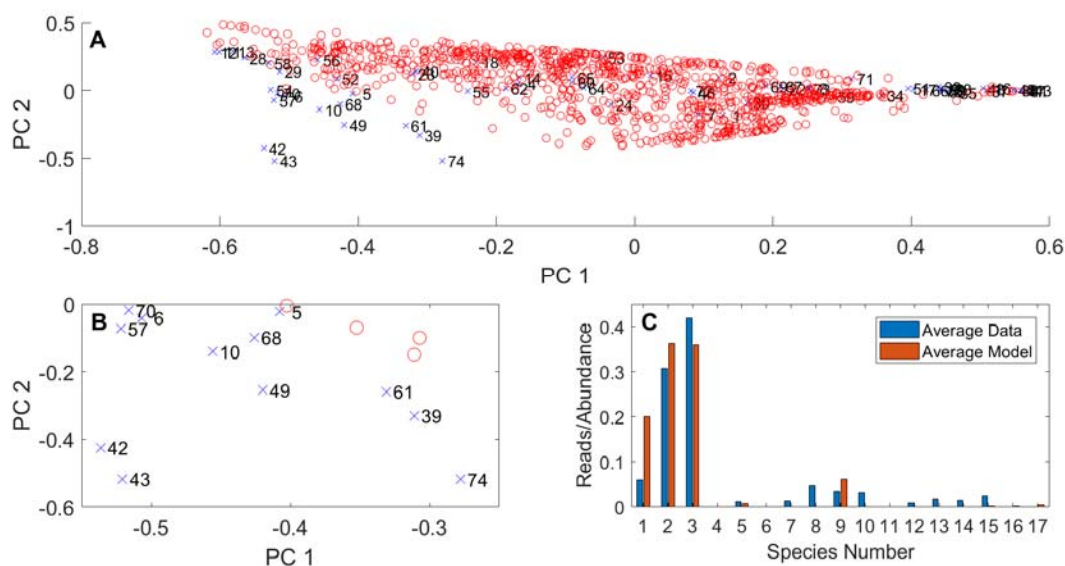

893

894

Figure 6

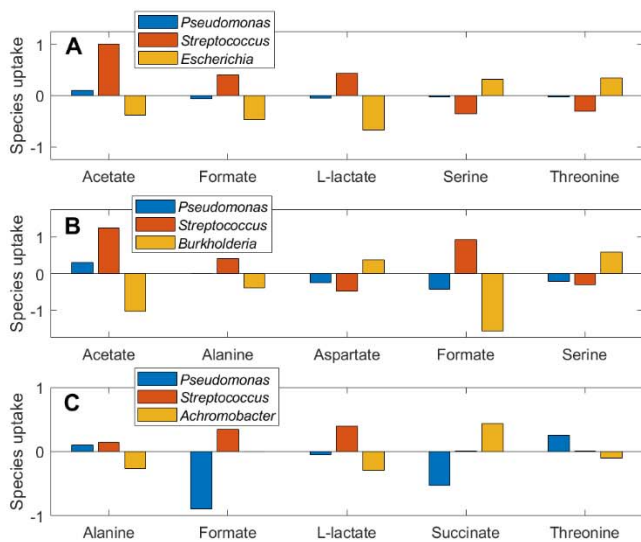

895

896

Figure 7

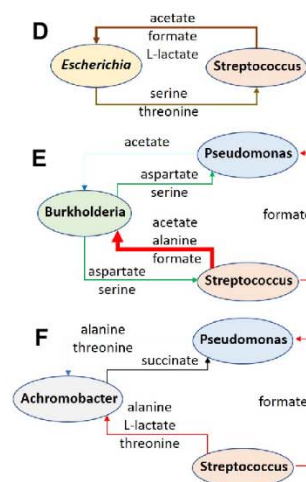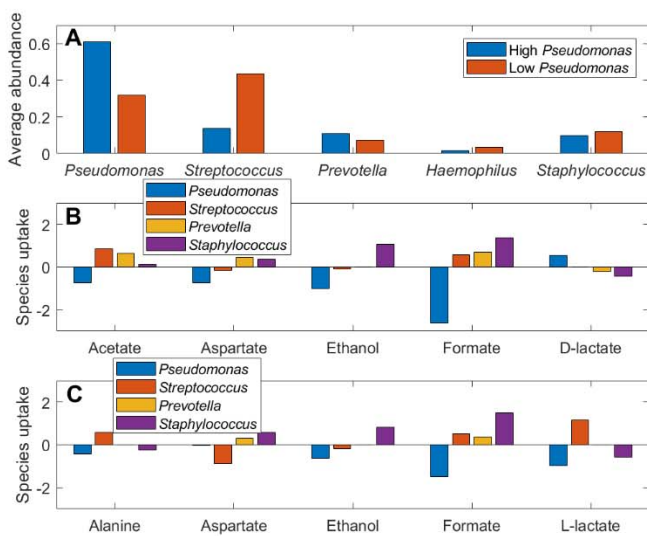

897

898

899

900

901

Figure 8

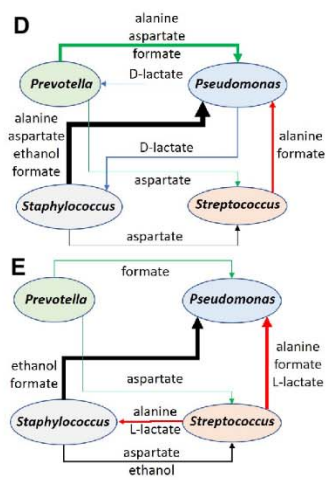

902 **Supplementary Materials**

903 Table S1. 16S sequencing reads for the top 72 taxonomic groups assembled from three published CF  
904 studies.

905 Table S2. 16S sequencing reads for the top 17 taxonomic groups assembled from three published CF  
906 studies.

907 Table S3. Normalized 16S sequencing reads for the top 17 taxonomic groups assembled from three  
908 published CF studies.

909 Table S4. Minimum, nominal and maximum community uptake rates for supplied nutrients.

910 Table S5. Principal component analysis of normalized read dataset containing all 75 samples.

911 Table S6. Principal component analysis of normalized read data excluding 8 samples containing  
912 *Enterobacteriaceae/Escherichia*, *Burkholderia* and *Achromobacter*.

913 Table S7. Comparison of normalized reads and model predicted abundances for 8 patients samples  
914 containing the pathogen *Enterobacteriaceae/Escherichia*, *Burkholderia* and *Achromobacter*.

915 Table S8. Comparison of normalized reads and model predicted abundances for 9 representative patient  
916 samples not containing the pathogens *Enterobacteriaceae/Escherichia*, *Burkholderia* or *Achromobacter*.

917
